# Supplementary material for: Risk Stratification Using a Novel Nomogram for 2190 EGFR-Mutant NSCLC Patients Receiving the First or Second Generation EGFR-TKI
Source: MDPI journal article supplement (doi:10.3390/cancers14040977), 2022-02-15

## Supplementary Materials

# Risk Stratification Using a Novel Nomogram for 2190 EGFR-Mutant NSCLC Patients Receiving the First or Second Generation EGFR-TKI

John Wen-Cheng Chang, Chen-Yang Huang, Yueh-Fu Fang, Ching-Fu Chang, Cheng-Ta Yang, Chih-Hsi Scott Kuo, Ping-Chih Hsu, Chiao-En Wu

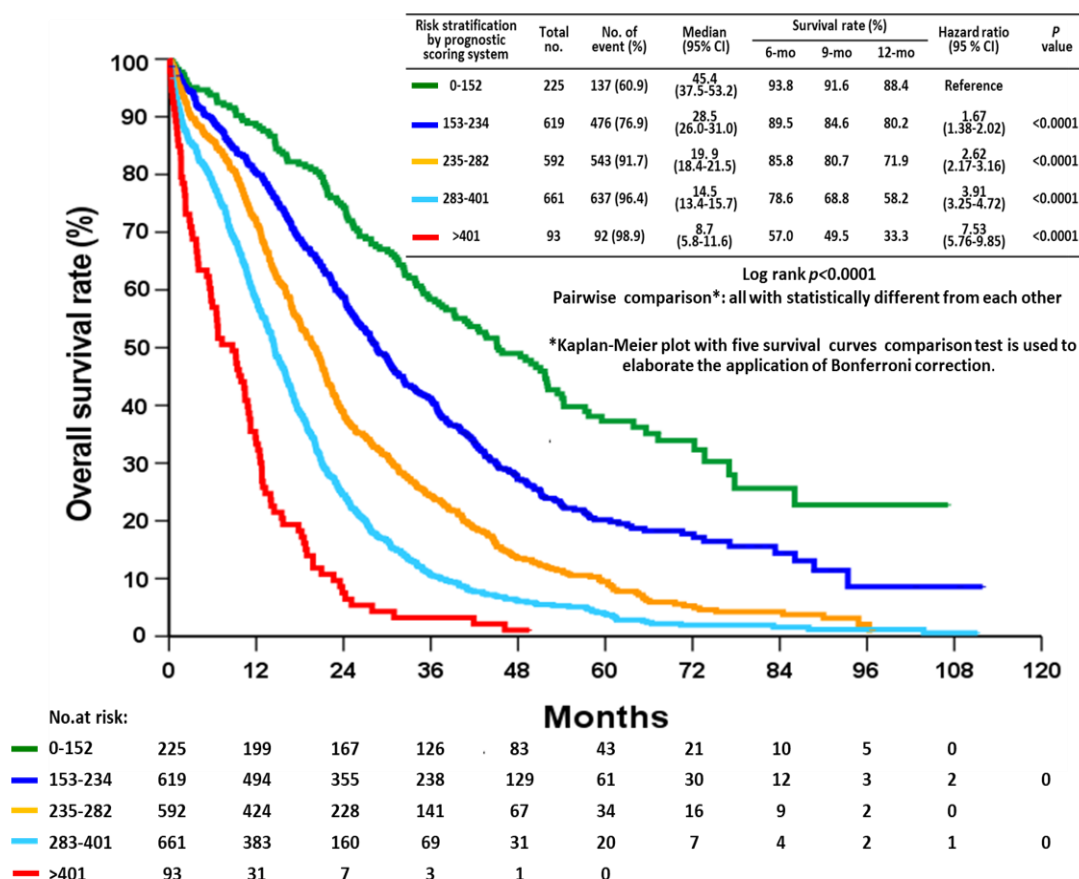

**Figure S1.** Kaplan-Meier plot of overall survival for 2190 patients according to risk stratification based on nomogram points.

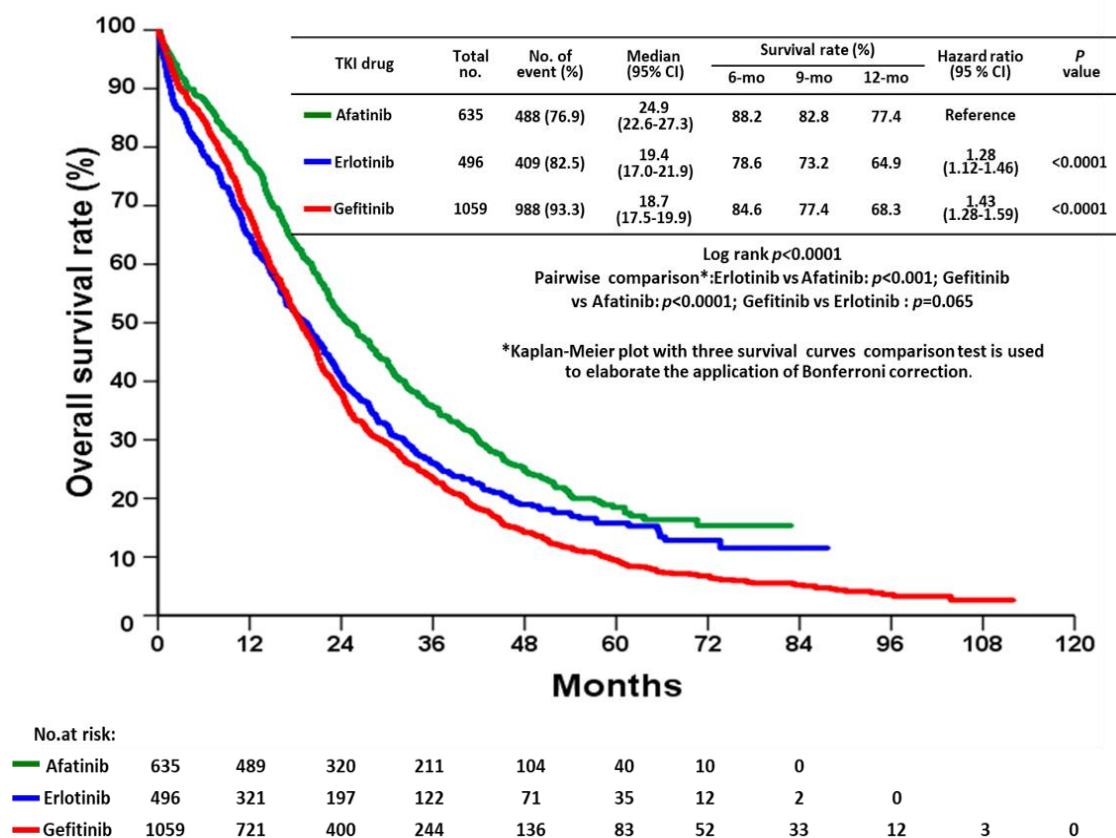

**Figure S2.** Kaplan-Meier plot of overall survival for 2190 patients according to the use of different EGKI-TKIs.

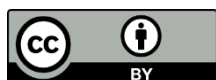

Supplement: s1 [file s1]
